# Supplementary material for: ¿Coerción, manipulación o motivación?
Source: MDPI journal article supplement (doi:10.3390/s22228993), 2008-01-01
Supplement: s1 [file s1]

Supplementary Information

# Temperature-Dependent Photoluminescence of CdS/ZnS Core/Shell Quantum Dots for Temperature Sensors

Luping Tang <sup>1,2,\*</sup>, Yangyang Zhang <sup>1</sup>, Chen Liao <sup>3</sup>, Yingqing Guo <sup>1</sup>, Yingtao Lu <sup>1</sup>, Yixuan Xia <sup>1</sup> and Yiwei Liu <sup>1</sup>

<sup>1</sup> College of Mechanical and Electrical Engineering, Nanjing Forestry University, Nanjing 210037, China

<sup>2</sup> SEU-FEI Nano-Pico Center, Key Lab of MEMS of Ministry of Education, Southeast University, Nanjing 210096, China

<sup>3</sup> College of Electronic and Optical Engineering & College of Flexible Electronics (Future Technology), Nanjing University of Posts and Telecommunications, Nanjing 210023, China

\* Correspondence: tlp@njfu.edu.cn

## **List of SI**

**Figure S1.** Temperature-dependent band-edge emission (BEE) peak energy, BEE full width at half-maximum (FWHM) and BEE intensity of CdS/ZnS QDs, and corresponding linear fitting relation curve.

**Table S1.** Comparison of previously reported semiconductor quantum dots (QDs)-based temperature sensors.

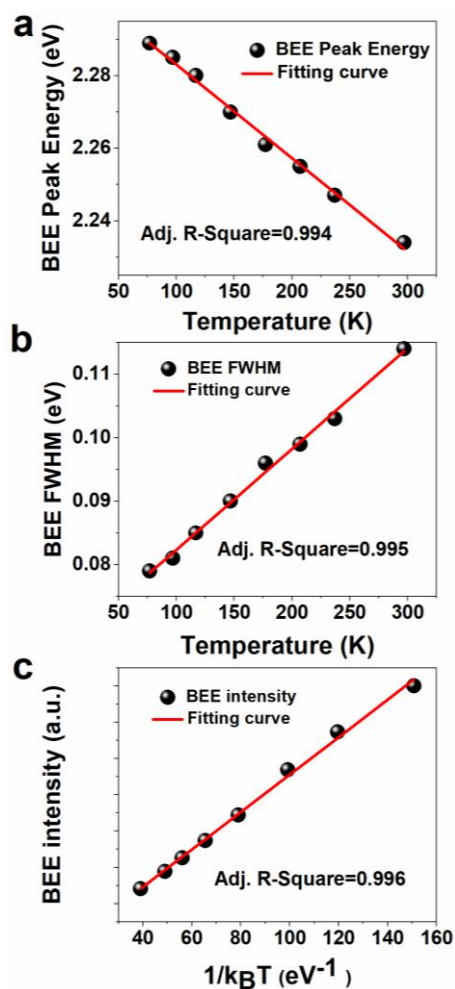

**Figure S1.** Temperature-dependent BEE peak energy (a) and BEE FWHM (b) of CdS/ZnS core/shell QDs in a temperature range of 77–297 K, respectively. (c) BEE intensity of CdS/ZnS core/shell QDs as a function of inverse  $k_B T$  in a temperature range of 77–297 K.

**Table S1.** Comparison of previously reported semiconductor quantum dots (QDs)-based temperature sensors.

| Sensing materials                                         | Sensitivity (% K <sup>-1</sup> ) | Temperature range (K) | Ref.         |
|-----------------------------------------------------------|----------------------------------|-----------------------|--------------|
| <b>CdS/ZnS</b>                                            | 2.14                             | 77–297                | In this work |
| <b>Mn<sup>2+</sup>-doped CdS-ZnS QDs</b>                  | 0.5                              | 77–320                | [1]          |
| <b>CdSe/ZnS QDs</b>                                       | 1.3                              | 100–315               | [2]          |
| <b>CdSe QDs</b>                                           | 0.69                             | 82–280                | [3]          |
| <b>PbS/CdS/CdSe QDs</b>                                   | 1.22                             | 180–300               | [4]          |
| <b>PbS/CdS giant QDs</b>                                  | 1.13                             | 150–373               | [5]          |
| <b>Mn<sup>2+</sup>-doped ZnSe-ZnCdSe QDs</b>              | 0.9                              | 82–280                | [6]          |
| <b>CuInS<sub>2</sub> QDs</b>                              | 1.0                              | 140–340               | [7]          |
| <b>Zn<sub>1-x</sub>Mn<sub>x</sub>Se/ZnS/CdS/ZnS QDs</b>   | 0.7                              | 373–673               | [8]          |
| <b>CdTe QDs film</b>                                      | 0.83                             | 23–80                 | [9]          |
| <b>CdTe QDs solution</b>                                  | 0.57                             | 23–80                 | [9]          |
| <b>CdTe QDs-Layered Double Hydroxides ultrathin films</b> | 1.47                             | 23–80                 | [9]          |
| <b>CdTe QDs@NaCl</b>                                      | 0.61                             | 80–360                | [10]         |
| <b>CdHgTe QDs@NaCl</b>                                    | 1.4                              | 80–340                | [11]         |

## Reference

1. Park, Y.; Koo, C.; Chen, H. Y.; Han, A.; Son, D. H. Ratiometric temperature imaging using environment-insensitive luminescence of Mn-doped core-shell nanocrystals. *Nanoscale* **2013**, *5*, 4944–4950.
2. Walker, G. W.; Sundar, V. C.; Rudzinski, C. M.; Wun, A. W.; Bawendi, M. G.; Nocera, D. G. Quantum-dot optical temperature probes. *Appl. Phys. Lett.* **2003**, *83*, 3555–3557.
3. Jethi, L.; Krause, M. M.; Kambhampati, P. Toward ratiometric nanothermometry via intrinsic dual emission from semiconductor nanocrystals. *J. Phys. Chem. Lett.* **2015**, *6*, 718–721.
4. Liu, J.; Zhang, H.; Selopal, G. S.; Sun, S.; Zhao, H.; Rosei, F. Visible and near-infrared, multiparametric, ultrasensitive nanothermometer based on dual-Emission colloidal quantum dots. *ACS Photonics* **2019**, *6*, 2479–2486.
5. Zhao, H. G.; Vomiero, A.; Rosei, F. Ultrasensitive, biocompatible, self-calibrating, multiparametric temperature sensors. *Small* **2015**, *11*, 5741–5746.
6. Vlaskin, V. A.; Janssen, N.; van Rijssel, J.; Beaulac, R.; Gamelin, D. R. Tunable dual emission in doped semiconductor nanocrystals. *Nano Lett.* **2010**, *10*, 3670–3674.
7. Marin, R.; Vivian, A.; Skripka, A.; Migliori, A.; Morandi, V.; Enrichi, F.; Vetrone, F.; Ceroni, P.; Aprile, C.; Canton, P. Mercaptosilane-passivated CuInS<sub>2</sub> quantum dots for luminescence thermometry and luminescent labels. *ACS Appl. Nano Mater.* **2019**, *2*, 2426–2436.
8. McLaurin, E. J.; Vlaskin, V. A.; Gamelin, D. R. Water-soluble dual-emitting nanocrystals for ratiometric optical thermometry. *J. Am. Chem. Soc.* **2011**, *133*, 14978–14980.
9. Liang, R.; Tian, R.; Shi, W.; Liu, Z.; Yan, D.; Wei, M.; Evans, D. G.; Duan, Xue. A temperature sensor based on CdTe quantum dots-layered double hydroxide ultrathin films via layer-by-layer assembly. *Chem. Commun.* **2013**, *49*, 969–971.
10. Kalytchuk, S.; Zhovtiuk, O.; Kershaw, S. V.; Zboril, R.; Rogach, A. L. Temperature-dependent exciton and trap-related photoluminescence of CdTe quantum dots embedded in a NaCl matrix: Implication in thermometry. *small* **2016**, *12*, 466–476.
11. Kalytchuk, S.; Adam, M.; Tomanec, O.; Zboril, R.; Gaponik, N.; Rogach, A. L. Sodium chloride protected CdHgTe quantum dot based solid-state near-infrared luminophore for light-Emitting devices and luminescence thermometry. *ACS Photonics* **2017**, *4*, 1459–1465.
